# Supplementary material for: Correlation ion mobility spectrometry
Source: Royal Society of Chemistry journal article supplement (doi:10.1039/c6an02249a), 2016-12-08
Supplement: c6an02249a1.pdf [file c6an02249a1.pdf]

## Supporting Information:

### Correlation Ion Mobility Spectrometry (CIMS)

Austen L. Davis, Wenjie Liu, William F. Siems, and Brian H. Clowers\*

*Department of Chemistry, Washington State University, Pullman, Washington 99164, United States. Fax: 509-335-8867;  
Tel: 509-335-5585; E-mail: brian.clowers@wsu.edu*

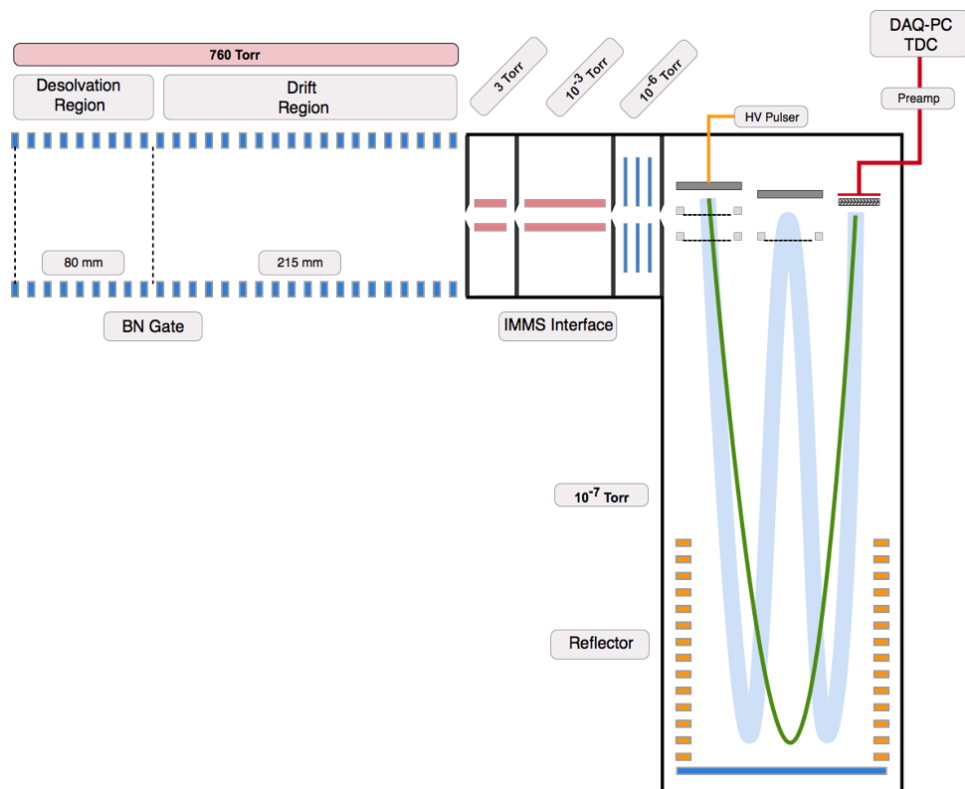

Supplementary Figure 1: Instrument schematic for the custom drift tube coupled to a commercial time-of-flight (TOF) mass spectrometer available through TOFWERKS

| Adjust End Freq.   |                 |               |          |                    | Rp    |      |        | Rp Error |      | S/N   |      |
|--------------------|-----------------|---------------|----------|--------------------|-------|------|--------|----------|------|-------|------|
| Ion                | Start Freq(Hz.) | End Freq(Hz.) | Sweep(s) | Min. GPW( $\mu$ s) | CIMS  | FT   | Theory | CIMS     | FT   | CIMS  | FT   |
| T3A                | 0               | 500           | 5        | 1000               | 35.2  | 8.3  | 34.0   | 0.6      | 0.6  | 88.8  | 12.6 |
| T3A                | 0               | 1000          | 5        | 500                | 66.9  | 33.2 | 62.4   | 1.1      | 2.0  | 181.6 | 17.7 |
| T3A                | 0               | 2500          | 5        | 200                | 124.3 | 60.2 | 107.9  | 0.9      | 1.7  | 102.8 | 18.2 |
| T3A                | 0               | 5000          | 5        | 100                | 133.6 | 62.7 | 127.5  | 1.2      | 1.8  | 44.6  | 11.7 |
| T3A                | 0               | 10000         | 5        | 50                 | 127.4 | 61.5 | 134.4  | 1.8      | 1.5  | 28.1  | 6.3  |
| T5A                | 0               | 500           | 5        | 1000               | 46.7  | *    | 45.0   | 0.9      | *    | 62.9  | *    |
| T5A                | 0               | 1000          | 5        | 500                | 84.9  | 37.7 | 78.3   | 1.2      | 1.9  | 354.0 | 22.1 |
| T5A                | 0               | 2500          | 5        | 200                | 130.0 | 53.5 | 118.7  | 0.4      | 1.9  | 195.4 | 17.6 |
| T5A                | 0               | 5000          | 5        | 100                | 128.0 | 59.8 | 131.6  | 0.6      | 1.8  | 94.4  | 12.1 |
| T5A                | 0               | 10000         | 5        | 50                 | 126.1 | 62.0 | 135.5  | 0.9      | 1.3  | 74.7  | 6.8  |
| T12A               | 0               | 500           | 5        | 1000               | 76.3  | 45.6 | 72.8   | 1.1      | 2.3  | 58.8  | 13.5 |
| T12A               | 0               | 1000          | 5        | 500                | 114.8 | 58.7 | 107.1  | 0.6      | 2.7  | 181.2 | 14.6 |
| T12A               | 0               | 2500          | 5        | 200                | 121.7 | 60.5 | 130.5  | 0.6      | 2.0  | 59.8  | 8.9  |
| T12A               | 0               | 5000          | 5        | 100                | 121.8 | 58.5 | 135.2  | 0.9      | 1.7  | 29.5  | 7.2  |
| T12A               | 0               | 10000         | 5        | 50                 | 118.6 | 62.4 | 136.5  | 1.4      | 1.9  | 26.0  | 4.2  |
| Adjust Sweep Time  |                 |               |          |                    | Rp    |      |        | Rp Error |      | S/N   |      |
| Ion                | Start Freq(Hz.) | End Freq(Hz.) | Sweep(s) | Min. GPW( $\mu$ s) | CIMS  | FT   | Theory | CIMS     | FT   | CIMS  | FT   |
| T3A                | 0               | 10000         | 0.05     | 50                 | 130.5 | 36.7 | 134.4  | 5.6      | 11.0 | 20.6  | 0.3  |
| T3A                | 0               | 10000         | 0.25     | 50                 | 130.9 | 76.8 | 134.4  | 2.9      | 6.2  | 39.1  | 1.8  |
| T3A                | 0               | 10000         | 0.5      | 50                 | 124.8 | 69.1 | 134.4  | 2.3      | 3.6  | 24.0  | 2.5  |
| T3A                | 0               | 10000         | 2.5      | 50                 | 123.5 | 63.5 | 134.4  | 1.7      | 2.7  | 44.5  | 4.8  |
| T5A                | 0               | 10000         | 0.05     | 50                 | 139.0 | *    | 135.5  | 9.2      | *    | 10.0  | *    |
| T5A                | 0               | 10000         | 0.25     | 50                 | 128.7 | 63.3 | 135.5  | 2.3      | 4.5  | 43.1  | 2.1  |
| T5A                | 0               | 10000         | 0.5      | 50                 | 130.3 | 66.2 | 135.5  | 2.2      | 3.0  | 33.1  | 2.8  |
| T5A                | 0               | 10000         | 2.5      | 50                 | 125.5 | 61.2 | 135.5  | 1.2      | 2.2  | 151.3 | 5.7  |
| T12A               | 0               | 10000         | 0.05     | 50                 | 147.5 | *    | 136.5  | 10.2     | *    | 12.6  | *    |
| T12A               | 0               | 10000         | 0.25     | 50                 | 127.4 | 96.4 | 136.5  | 3.8      | 15.9 | 38.7  | 0.6  |
| T12A               | 0               | 10000         | 0.5      | 50                 | 122.9 | 72.3 | 136.5  | 3.0      | 6.0  | 18.2  | 1.0  |
| T12A               | 0               | 10000         | 2.5      | 50                 | 116.0 | 66.5 | 136.5  | 1.4      | 2.8  | 83.4  | 2.8  |
| Adjust Start Freq. |                 |               |          |                    | Rp    |      |        | Rp Error |      | S/N   |      |
| Ion                | Start Freq(Hz.) | End Freq(Hz.) | Sweep(s) | Min. GPW( $\mu$ s) | CIMS  | FT   | Theory | CIMS     | FT   | CIMS  | FT   |
| T3A                | 5               | 10000         | 5        | 50                 | 134.2 | 66.6 | 134.4  | 1.9      | 1.9  | 21.5  | 6.5  |
| T3A                | 10              | 10000         | 5        | 50                 | 130.9 | 62.3 | 134.4  | 2.0      | 1.8  | 18.6  | 6.4  |
| T3A                | 50              | 10000         | 5        | 50                 | 138.7 | 65.0 | 134.4  | 2.8      | 1.8  | 17.9  | 6.3  |
| T3A                | 100             | 10000         | 5        | 50                 | 143.5 | 65.9 | 134.4  | 3.6      | 2.2  | 19.3  | 7.0  |
| T3A                | 200             | 10000         | 5        | 50                 | 153.7 | 67.7 | 134.4  | 4.6      | 2.0  | 18.5  | 7.4  |
| T3A                | 500             | 10000         | 5        | 50                 | 172.4 | 52.9 | 134.4  | 7.9      | 1.8  | 14.2  | 5.9  |
| T3A                | 1000            | 10000         | 5        | 50                 | 207.1 | 49.0 | 134.4  | 12.7     | 1.9  | 12.2  | 4.0  |
| T5A                | 5               | 10000         | 5        | 50                 | 130.6 | 62.9 | 135.5  | 1.4      | 1.4  | 38.7  | 6.6  |
| T5A                | 10              | 10000         | 5        | 50                 | 133.0 | 64.6 | 135.5  | 1.5      | 1.5  | 28.4  | 7.1  |
| T5A                | 50              | 10000         | 5        | 50                 | 136.2 | 63.6 | 135.5  | 2.1      | 1.2  | 26.5  | 8.7  |
| T5A                | 100             | 10000         | 5        | 50                 | 142.4 | 60.8 | 135.5  | 2.9      | 1.4  | 30.2  | 10.0 |
| T5A                | 200             | 10000         | 5        | 50                 | 155.4 | 56.2 | 135.5  | 4.2      | 1.4  | 28.7  | 9.2  |
| T5A                | 500             | 10000         | 5        | 50                 | 186.7 | 50.8 | 135.5  | 7.9      | 1.4  | 20.2  | 7.3  |
| T5A                | 1000            | 10000         | 5        | 50                 | 223.7 | 40.8 | 135.5  | 10.9     | 1.9  | 15.6  | 3.4  |
| T12A               | 5               | 10000         | 5        | 50                 | 122.4 | 63.2 | 136.5  | 1.3      | 1.8  | 20.8  | 3.9  |
| T12A               | 10              | 10000         | 5        | 50                 | 123.7 | 60.4 | 136.5  | 1.4      | 1.9  | 16.0  | 3.9  |
| T12A               | 50              | 10000         | 5        | 50                 | 135.9 | 68.3 | 136.5  | 3.1      | 1.6  | 11.2  | 4.7  |
| T12A               | 100             | 10000         | 5        | 50                 | 145.8 | 68.5 | 136.5  | 4.3      | 1.8  | 10.3  | 4.0  |
| T12A               | 200             | 10000         | 5        | 50                 | 164.2 | 52.5 | 136.5  | 6.5      | 1.8  | 10.2  | 3.5  |
| T12A               | 500             | 10000         | 5        | 50                 | 202.3 | 50.5 | 136.5  | 10.4     | 2.7  | 6.5   | 1.8  |
| T12A               | 1000            | 10000         | 5        | 50                 | 162.1 | *    | 136.5  | 7.7      | *    | 3.9   | *    |

Supplementary Table 1: A table comparing the effect of altering different sweep parameters. These different sweep parameters include altering the sweep time, starting frequency, and ending frequency of the linear chirp.

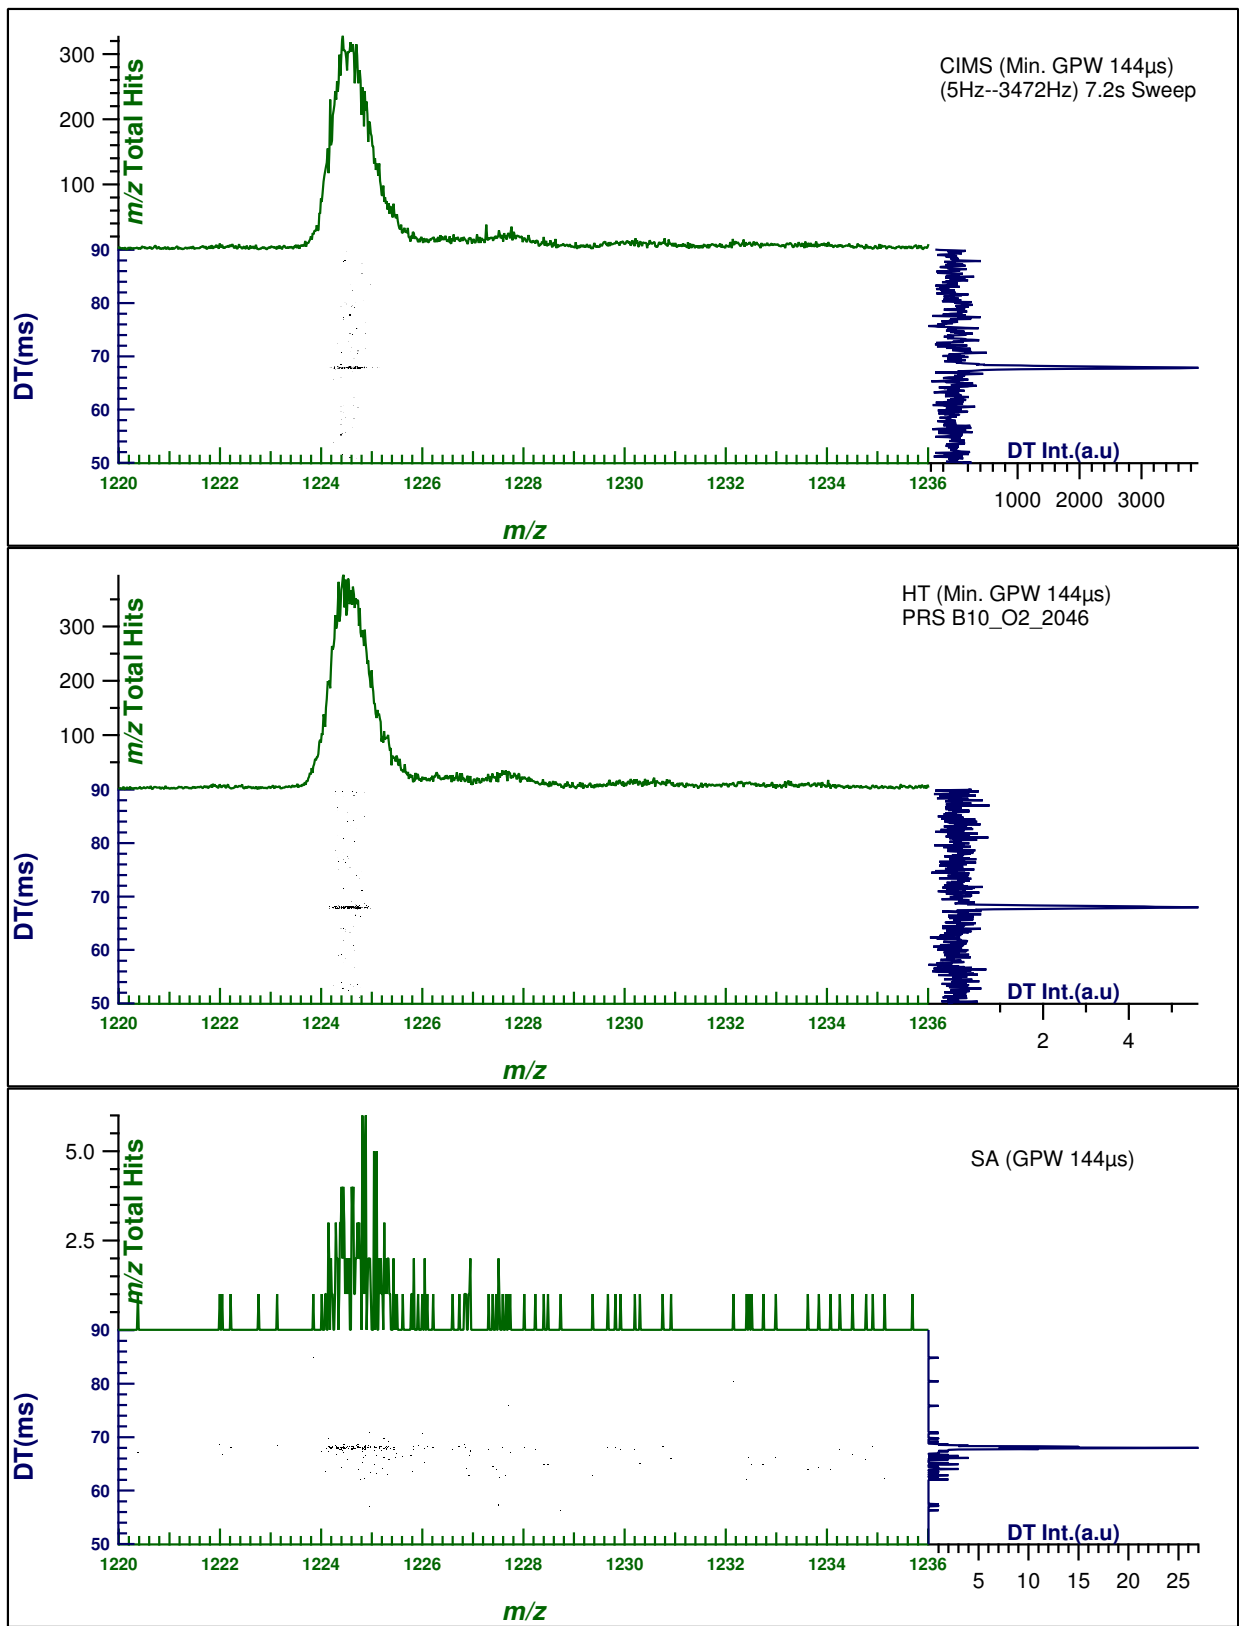

Supplementary Figure 2: A comparison of the different common multiplexing modes of operation for ubiquitin. Each mobility spectrum corresponds to the +7 charge state of Ubiquitin. Acquisition time was 3 minutes for each experiment.

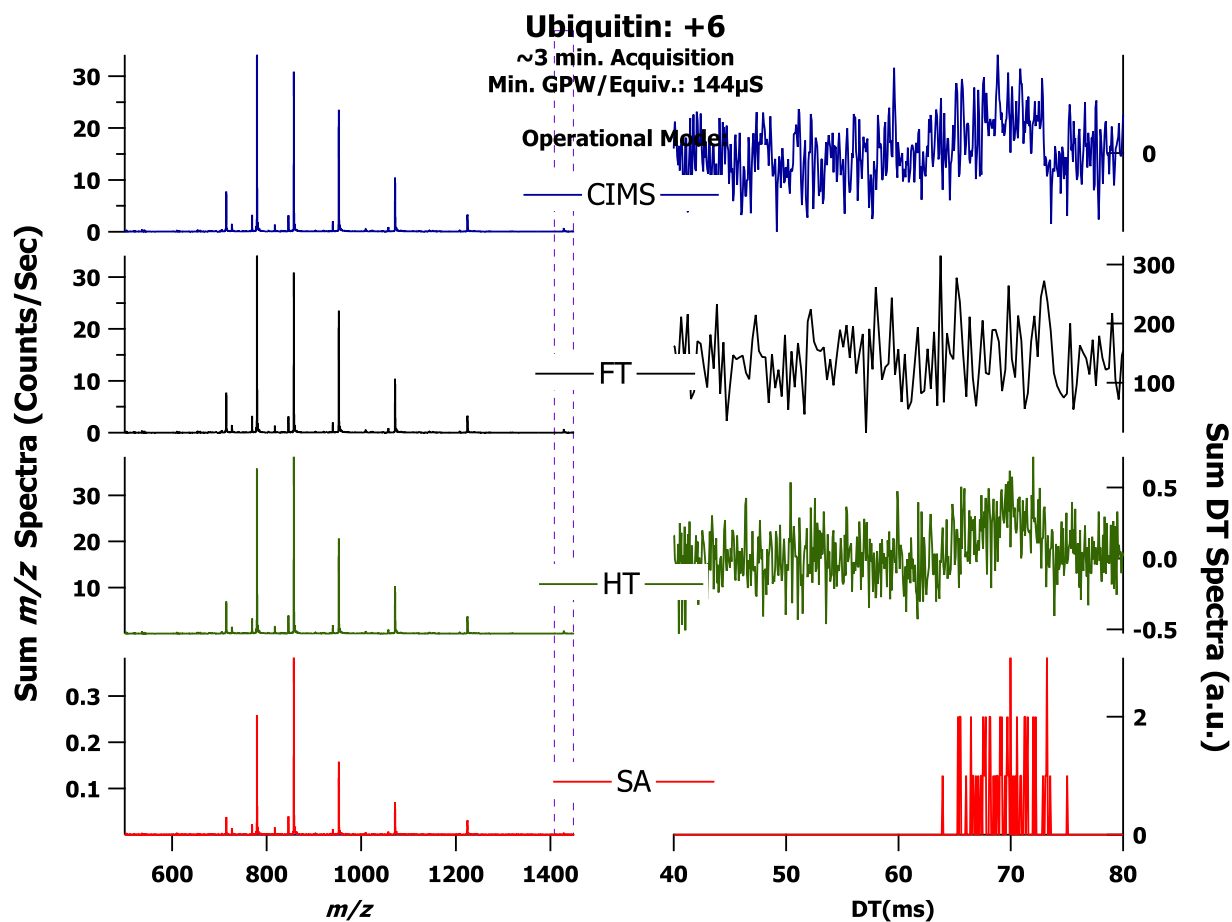

Supplementary Figure 3: A comparison of the different common multiplexing modes of operation for ubiquitin. Each mobility spectrum corresponds to the +6 charge state of Ubiquitin. Acquisition time was 3 minutes for each experiment.

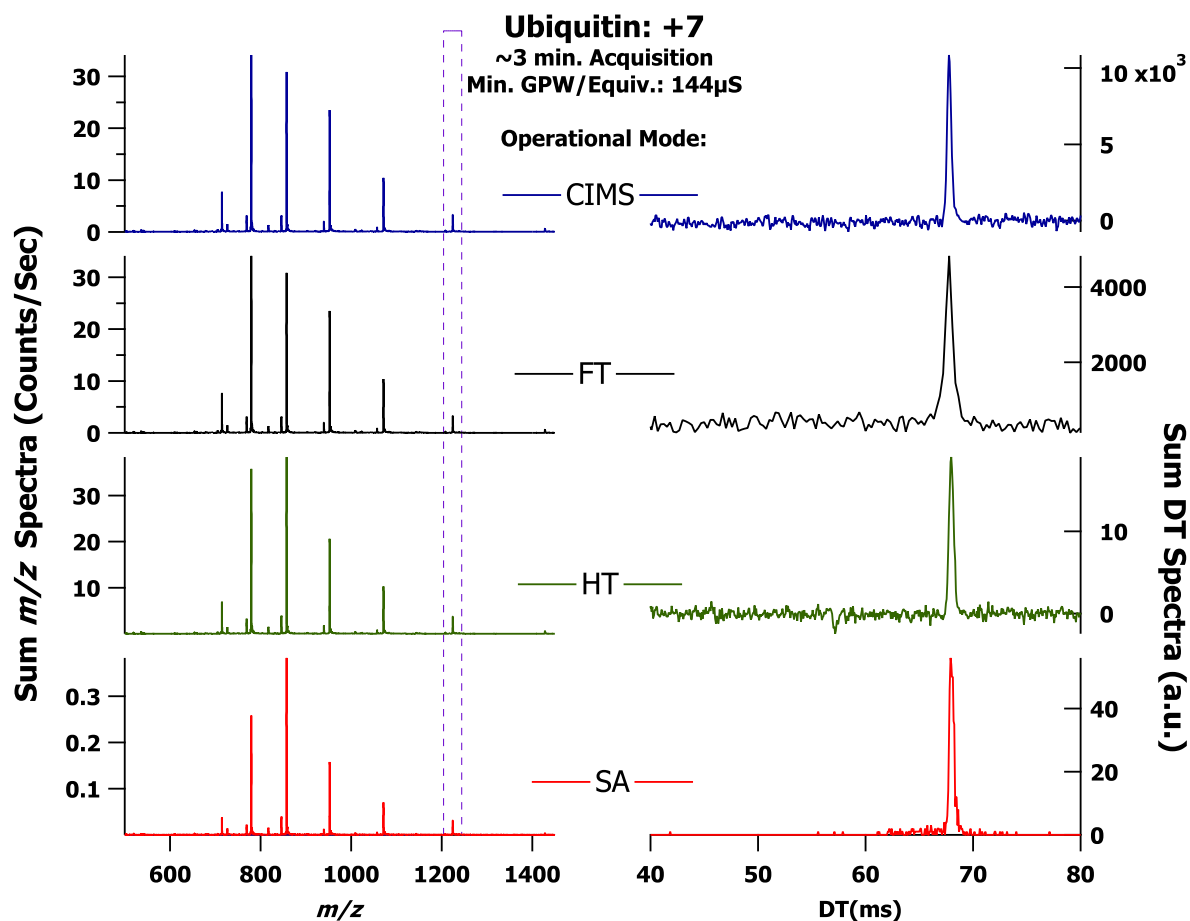

Supplementary Figure 4: A comparison of the different common multiplexing modes of operation for ubiquitin. Each mobility spectrum corresponds to the +7 charge state of Ubiquitin. Acquisition time was 3 minutes for each experiment.

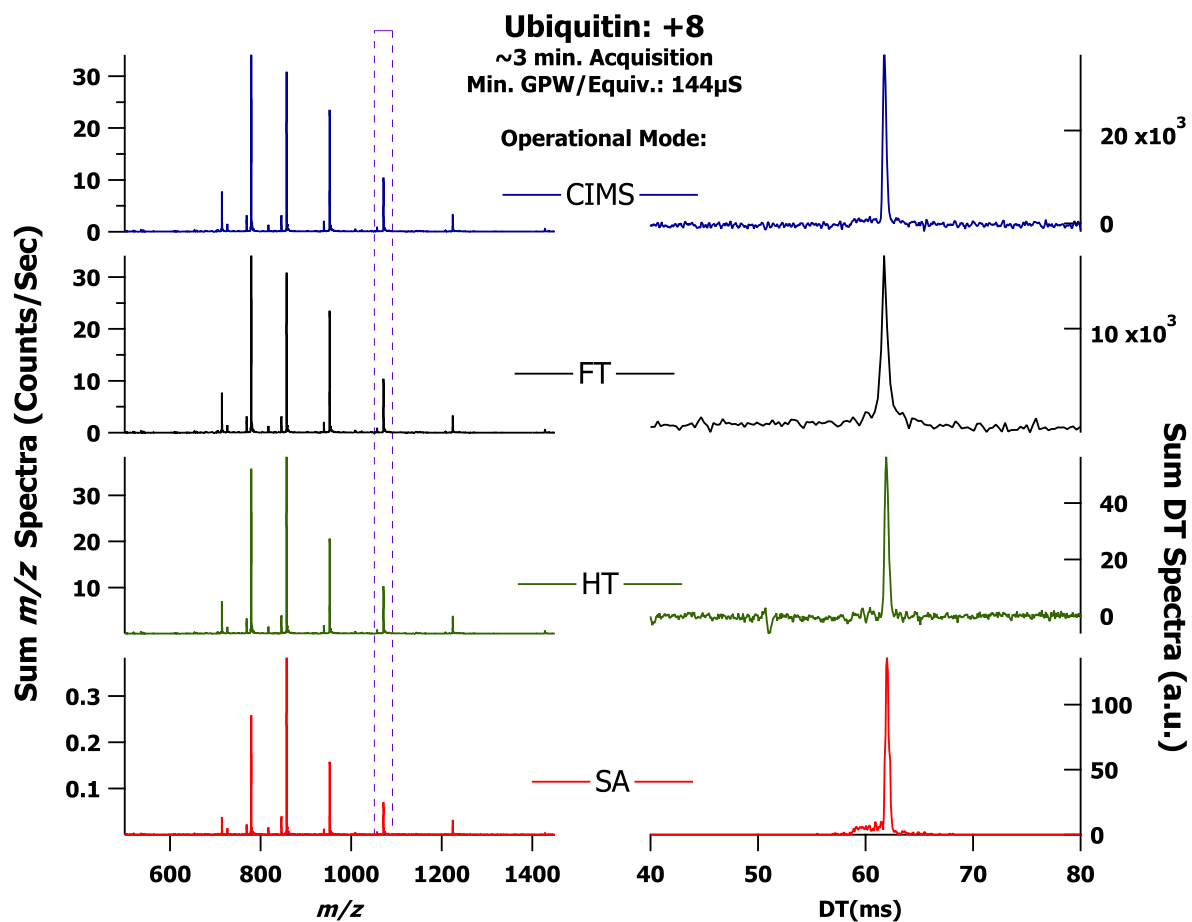

Supplementary Figure 5: A comparison of the different common multiplexing modes of operation for ubiquitin. Each mobility spectrum corresponds to the +8 charge state of Ubiquitin. Acquisition time was 3 minutes for each experiment.

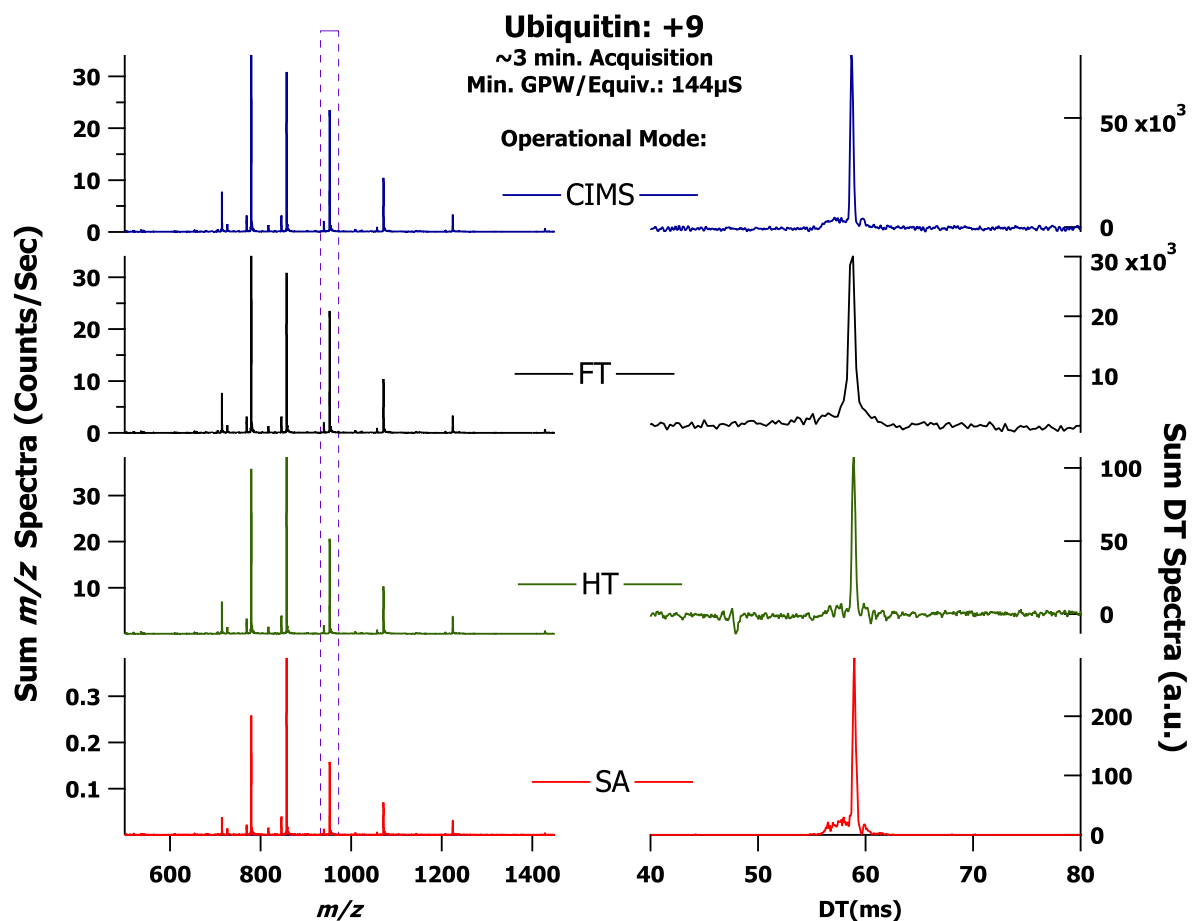

Supplementary Figure 6: A comparison of the different common multiplexing modes of operation for ubiquitin. Each mobility spectrum corresponds to the +9 charge state of Ubiquitin. Acquisition time was 3 minutes for each experiment.

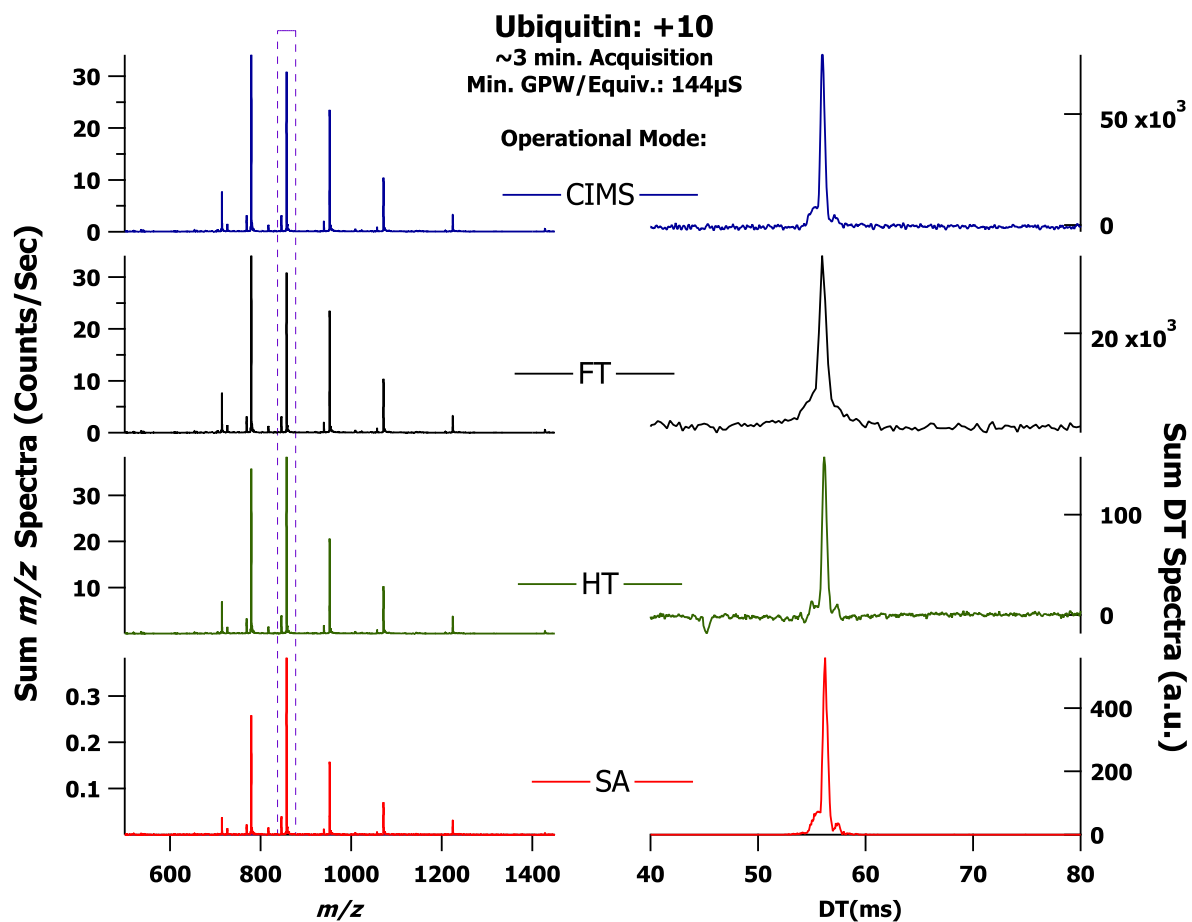

Supplementary Figure 7: A comparison of the different common multiplexing modes of operation for ubiquitin. Each mobility spectrum corresponds to the +10 charge state of Ubiquitin. Acquisition time was 3 minutes for each experiment.

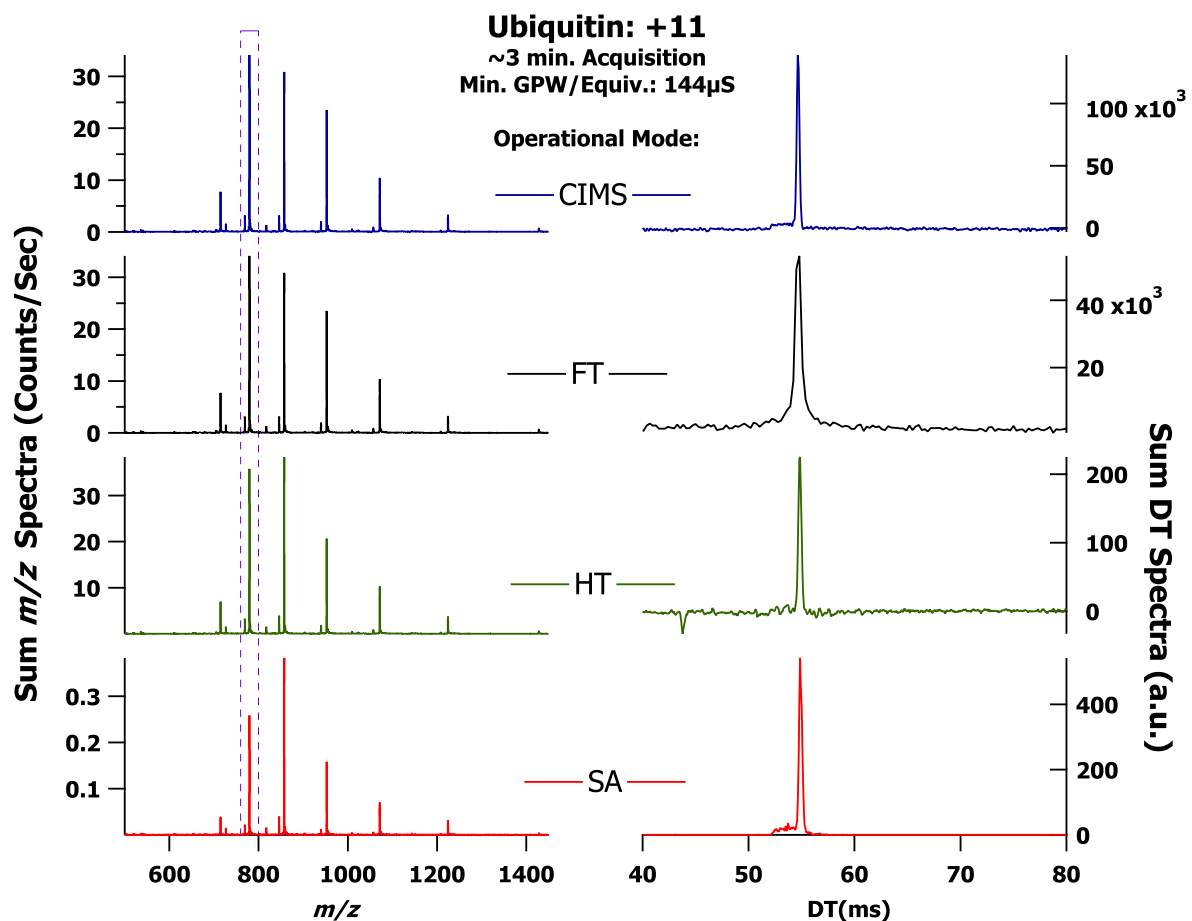

Supplementary Figure 8: A comparison of the different common multiplexing modes of operation for ubiquitin. Each mobility spectrum corresponds to the +11 charge state of Ubiquitin. Acquisition time was 3 minutes for each experiment.

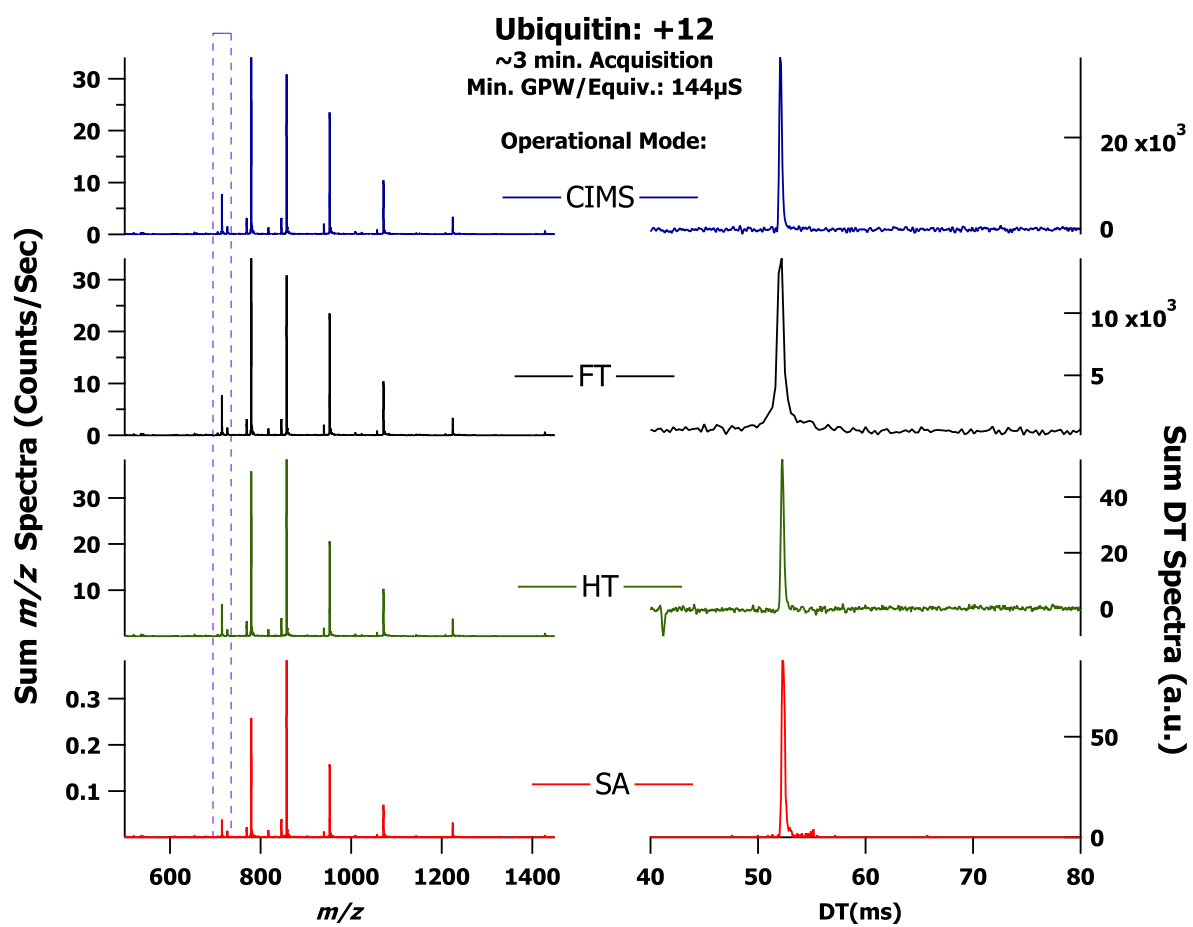

Supplementary Figure 9: A comparison of the different common multiplexing modes of operation for ubiquitin. Each mobility spectrum corresponds to the +12 charge state of Ubiquitin. Acquisition time was 3 minutes for each experiment.



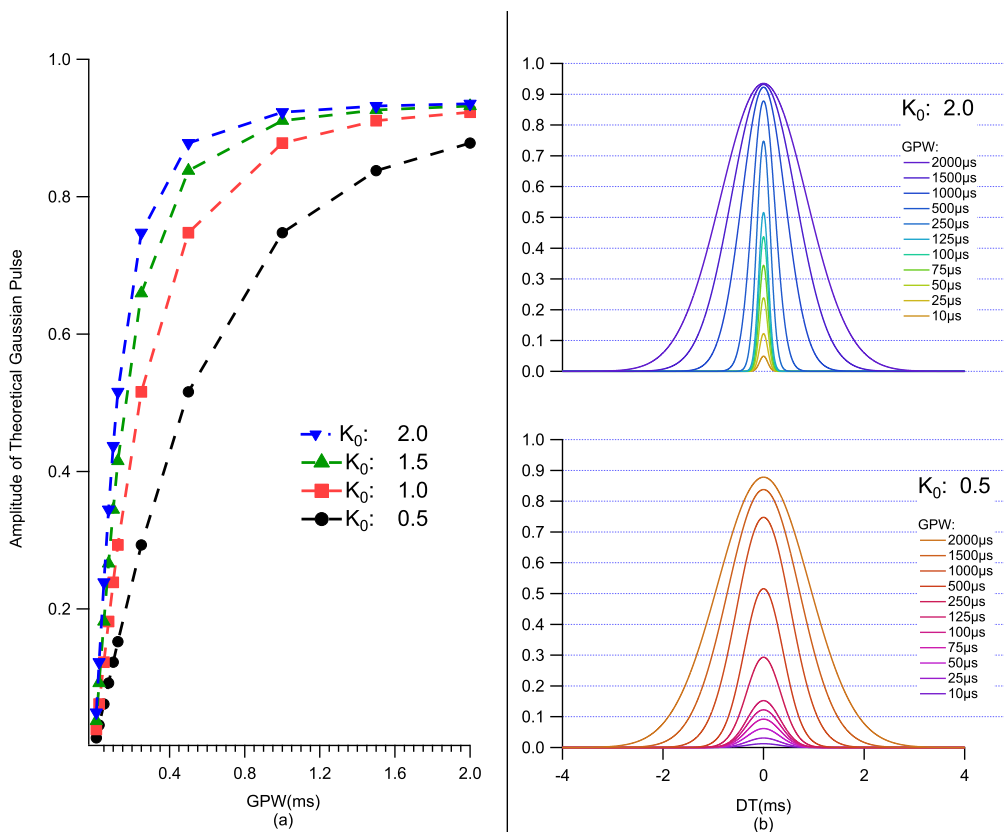

Supplementary Figure 10: The assumptions regarding the following figure include the peak width at half-maximum (FWHM) of an ion observed at the detector is equal to the  $\sqrt{t_{gpw}^2 + t_{diff}^2}$ . The area of the theoretical Gaussian peak was adjusted to equal the applied gate pulse width. The drift time of the peak was offset so the theoretical Gaussian spectra pulse is centered at 0ms. (a) The peak amplitude measured for a theoretical ion with a specific reduced mobility value. (b) A plot of the theoretical Gaussian profiles for ions with reduced mobilities of 2.0 and 0.5. Amplitude saturation is observed at lower gate pulse widths for ions of higher mobility than the amplitude saturation observed for low mobility ions. The greater contribution of diffusional broadening to resolving power at lower gate pulse widths is mobility dependent and can serve to bias higher mobility ions after transformation using CIMS.
